# Supplementary material for: The clinical and molecular significance associated with STING signaling in breast cancer
Source: PubMed Central journal article supplement (PMC8233333; doi:10.1038/s41523-021-00283-z), 2021-06-25
Supplement: 41523_2021_283_MOESM1_ESM.pdf [file 41523_2021_283_MOESM1_ESM.pdf]

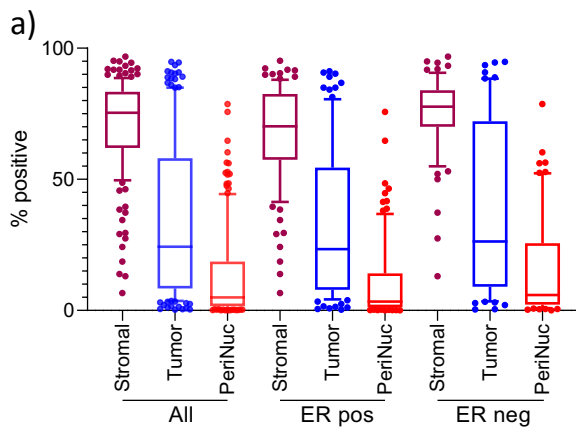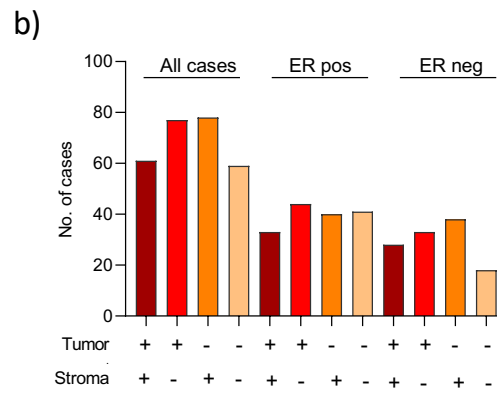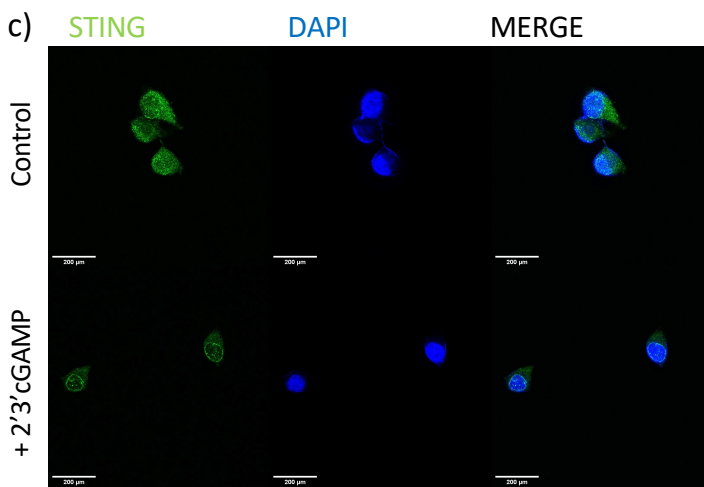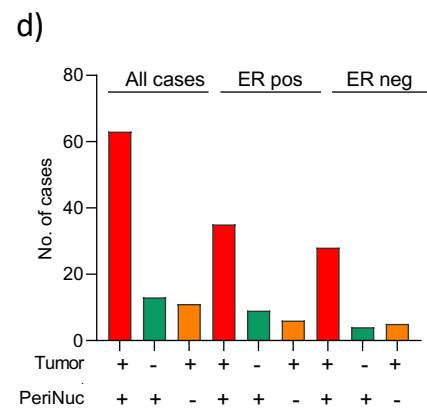

*Supplementary Figure 1: Tumor, Stromal and Perinuclear STING expression in breast cancer*

**a)** Percentage positive cells for stromal, tumor and perinuclear STING in ER positive and ER negative tumors in discovery dataset. **b)** Distribution of tumor and stromal expression of STING where + represents > median expression and - represents < median expression. Median is calculated on whole dataset expression. **c)** Immunofluorescence images of MDA436-EV cells treated with either control or 2'3' cGAMP (10 μg/ml) for 60 minutes. Scale bar = 200 μm. **d)** Unique expression of tumor or perinuclear-only STING in all cases, ER positive and ER negative breast tumors where + represents > median expression and - represents < median expression. Median is calculated on whole dataset expression.

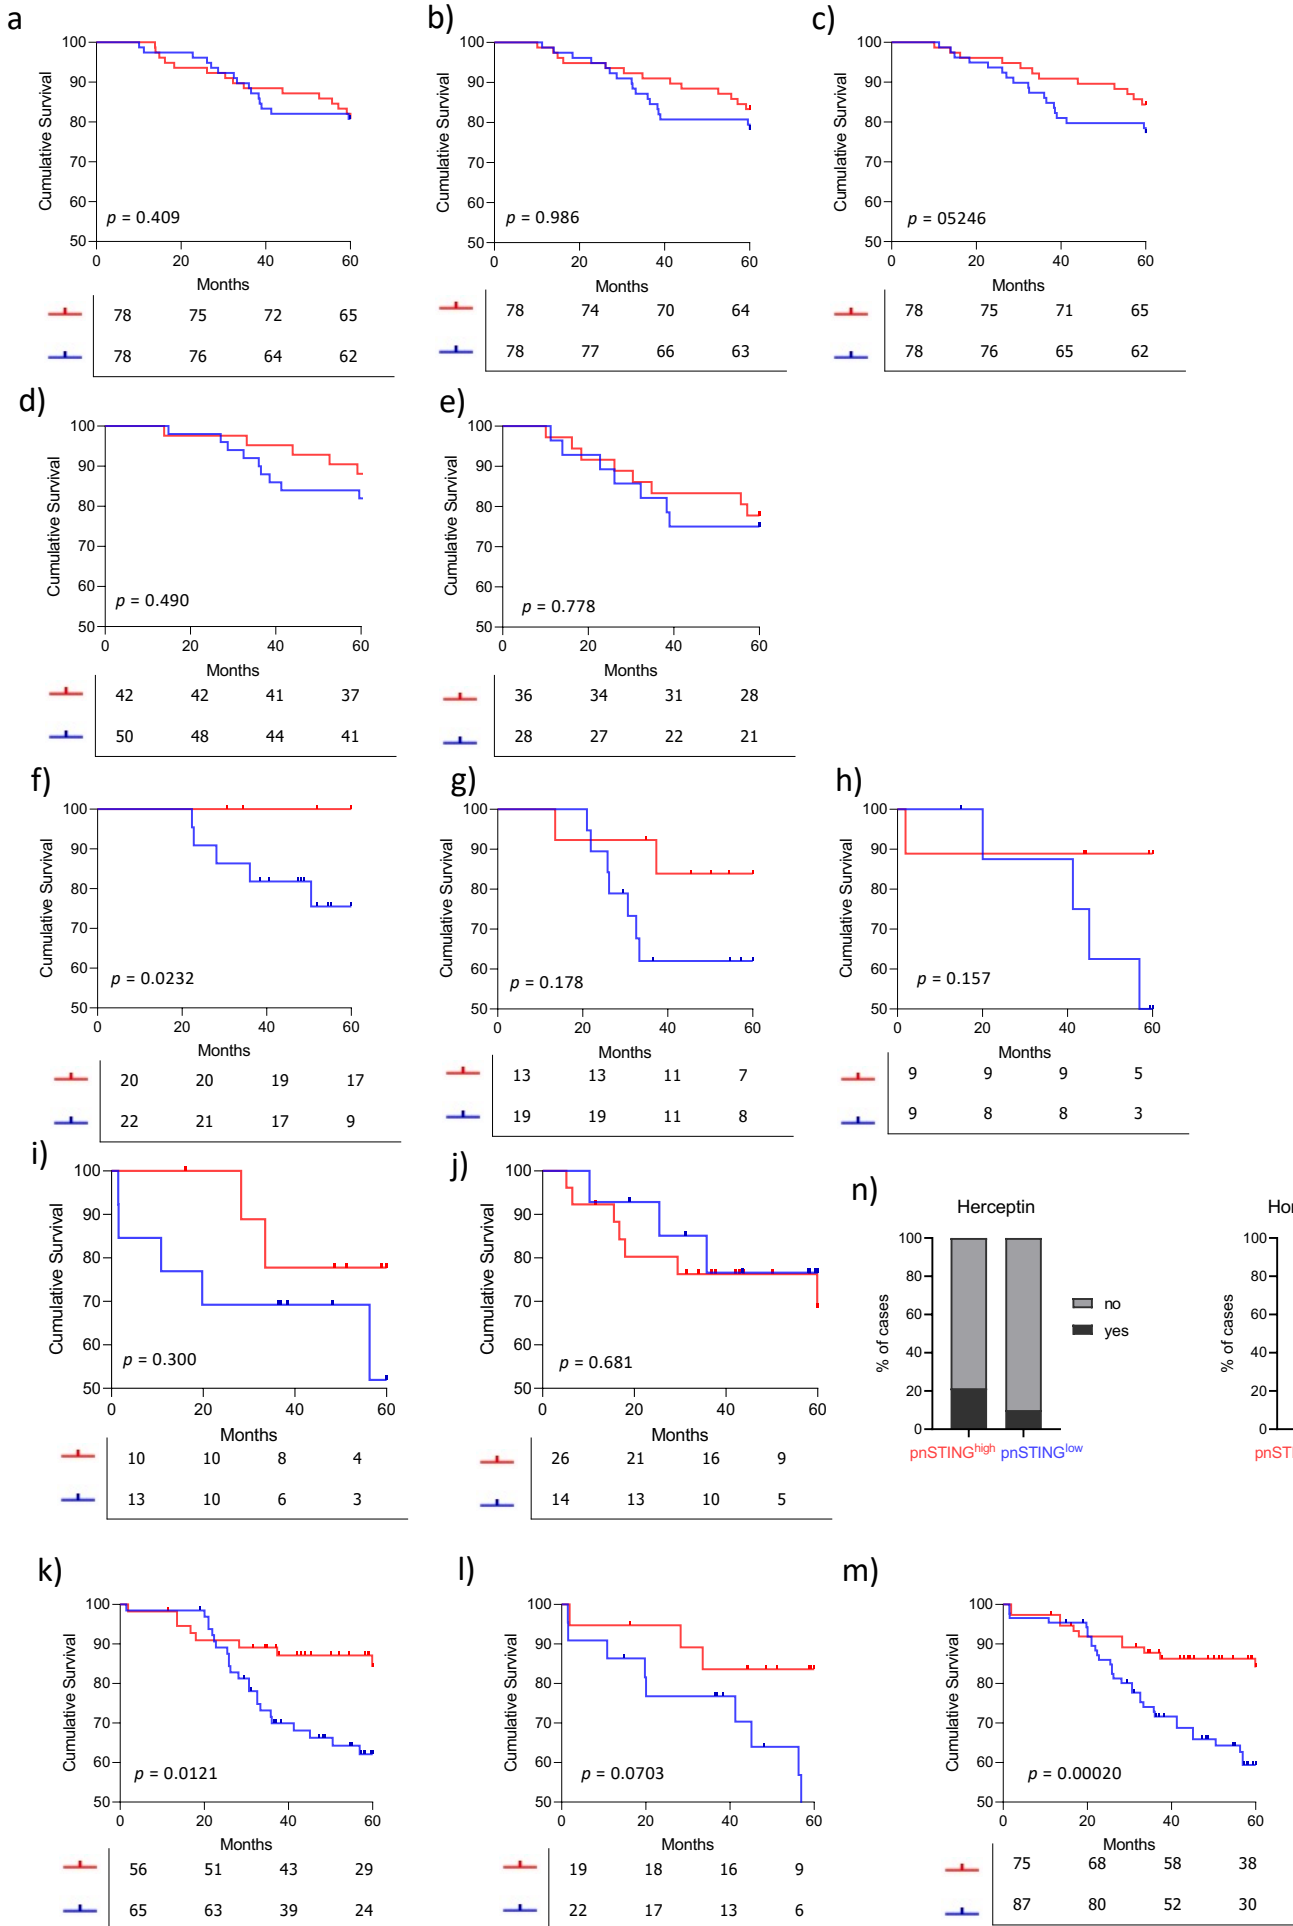

*Supplementary Figure 2: pnSTING IHC score predicts outcome in ER+ breast cancer*

Kaplan Meier Curve of overall survival (OS) stratified based on high (above median) or low (below median) of STING expression in the **a)** stromal compartment, **b)** tumour epithelial compartment or **c)** perinuclear region. Kaplan Meier Curve of overall survival (OS) stratified based on high (above median of all cases) or low (below median of all cases) of STING expression in the perinuclear region in **d)** ER positive (ER+) and **e)** ER negative (ER-) cases. Kaplan Meier Curve of Relapse Free Survival (RFS) stratified based on high (above median) or low (below median) of STING expression in the perinuclear region in St Gallen subtypes: **f)** ER+/HER2-/Ki67-, **g)** ER+/HER2-/Ki67+, **h)** ER+/HER2+/Ki67+, **i)** ER-/HER2+ and **j)** ER-/PR-/HER2- (TNBC). Kaplan Meier Curve of Relapse Free Survival (RFS) stratified based on high (above median) or low (below median) of STING expression in the perinuclear region in **k)** ER+/HER2-/Ki67+/- , **l)** ER+/- /HER2+and **m)** Non TNBC. **n)** Stacked bar chart of the percentage of ER+ patients stratified based on high (above median) or low (below median) of STING expression in the perinuclear region based on clinical attributes: Herceptin Treatment (left panel), Hormone Therapy (right panel).

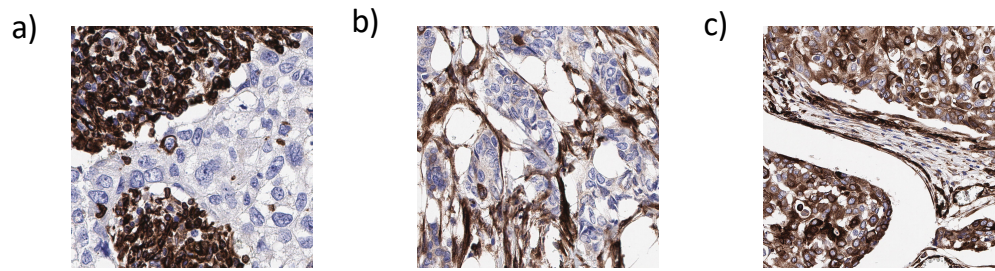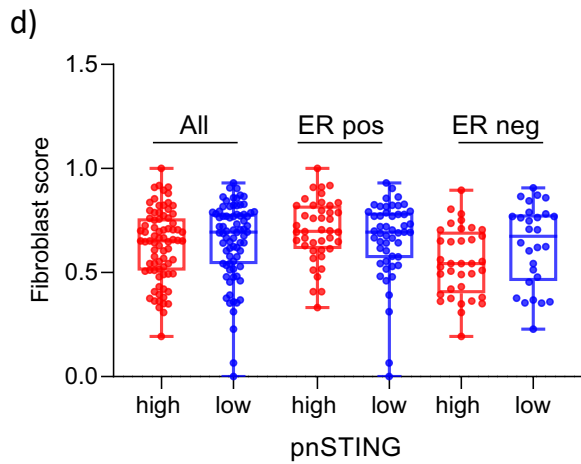

*Supplementary Figure 3: Stromal STING expression and association with fibroblasts in the tumor microenvironment*

**a-c)** IHC images of STING staining in samples where stromal regions are positive for STING. Magnification x 40. STING expression cannot be delineated within stromal regions. **d)** Expression of stromal fibroblast gene expression signature in the discovery dataset, ER+ and ER- disease as shown. pnSTING<sup>high</sup> v low in both: p = 0.528; in ER+ p = 0.0895; in ER- p = 0.0750.



*Supplementary Figure 4: pnSTING immune correlates in ER+ and ER- breast cancer*

**a)** Heatmap of normalized expression measured by IHC of perinuclear STING, stroma STING, tumor STING, CD3, CD4, CD68, CD45RO, CD163, FOXP3, CD8, CD20, Ki-67, PD-L1 measured by SP263 and SP142, TIM3, IDO1 and ICOS in ER+ breast cancer cases. Expression was quantified in the stroma compartment (S), tumor epithelial compartment (T) or whole core (WC) as indicated. **b)** Heatmap of normalized expression measured by IHC of perinuclear STING, stroma STING, tumor STING, CD3, CD4, CD68, CD45RO, CD163, FOXP3, CD8, CD20, Ki-67, PD-L1 measured by SP263 and SP142, TIM3, IDO1 and ICOS in ER- breast cancer cases. Expression was quantified in the stroma compartment (S), tumor epithelial compartment (T) or whole core (WC) as indicated. **c)** Heatmap of normalized immune scores derived from deconvolution of microarray data in ER- breast cancer cases. Correlation between markers and perinuclear STING stratified based on high (above median) and low (below median) using the Krushall Wallis test on non-transformed data with \*, \*\* and \*\*\* indicating p values of < 0.05, < 0.01 and < 0.001 respectively.

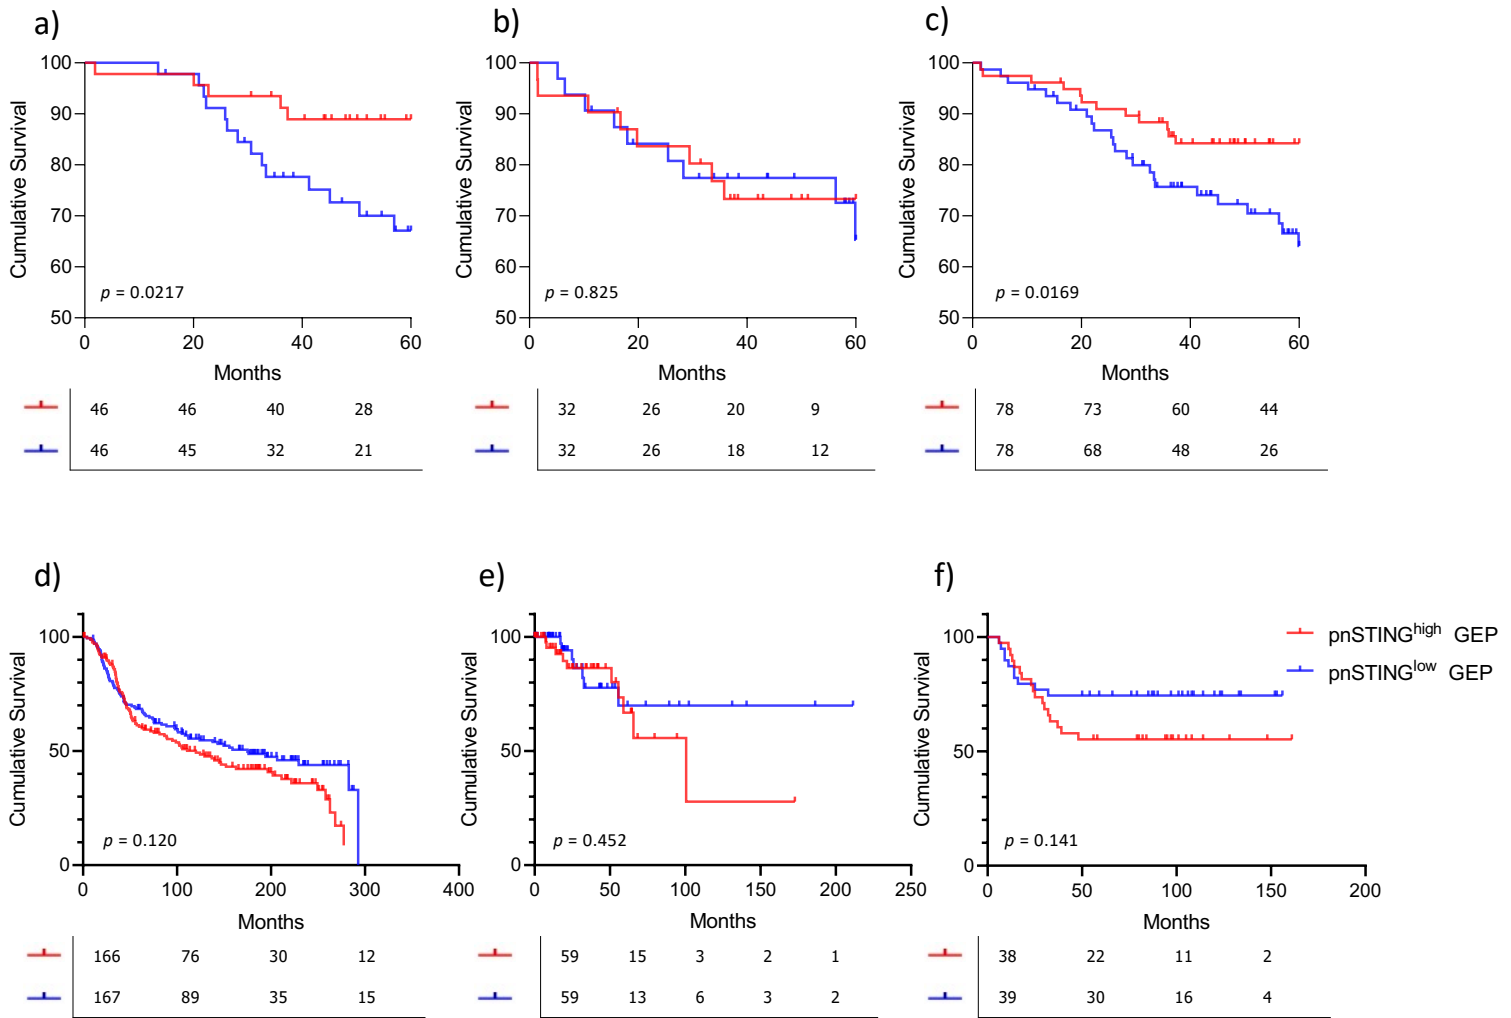

**Supplementary Figure 5: *pnSTING<sup>low</sup>* gene expression signature in ER negative breast cancer**

Kaplan Meier Curve analysis of relapse free survival (RFS - months) in **a)** ER positive (ER+), **b)** ER negative (ER-) and **c)** all samples with STING IHC data from discovery dataset stratified by *pnSTING* signature score. Kaplan Meier Curve analysis of overall survival (months) in ER- disease from the **d)** METABRIC **e)** TCGA 2012 and **f)** Wang datasets.

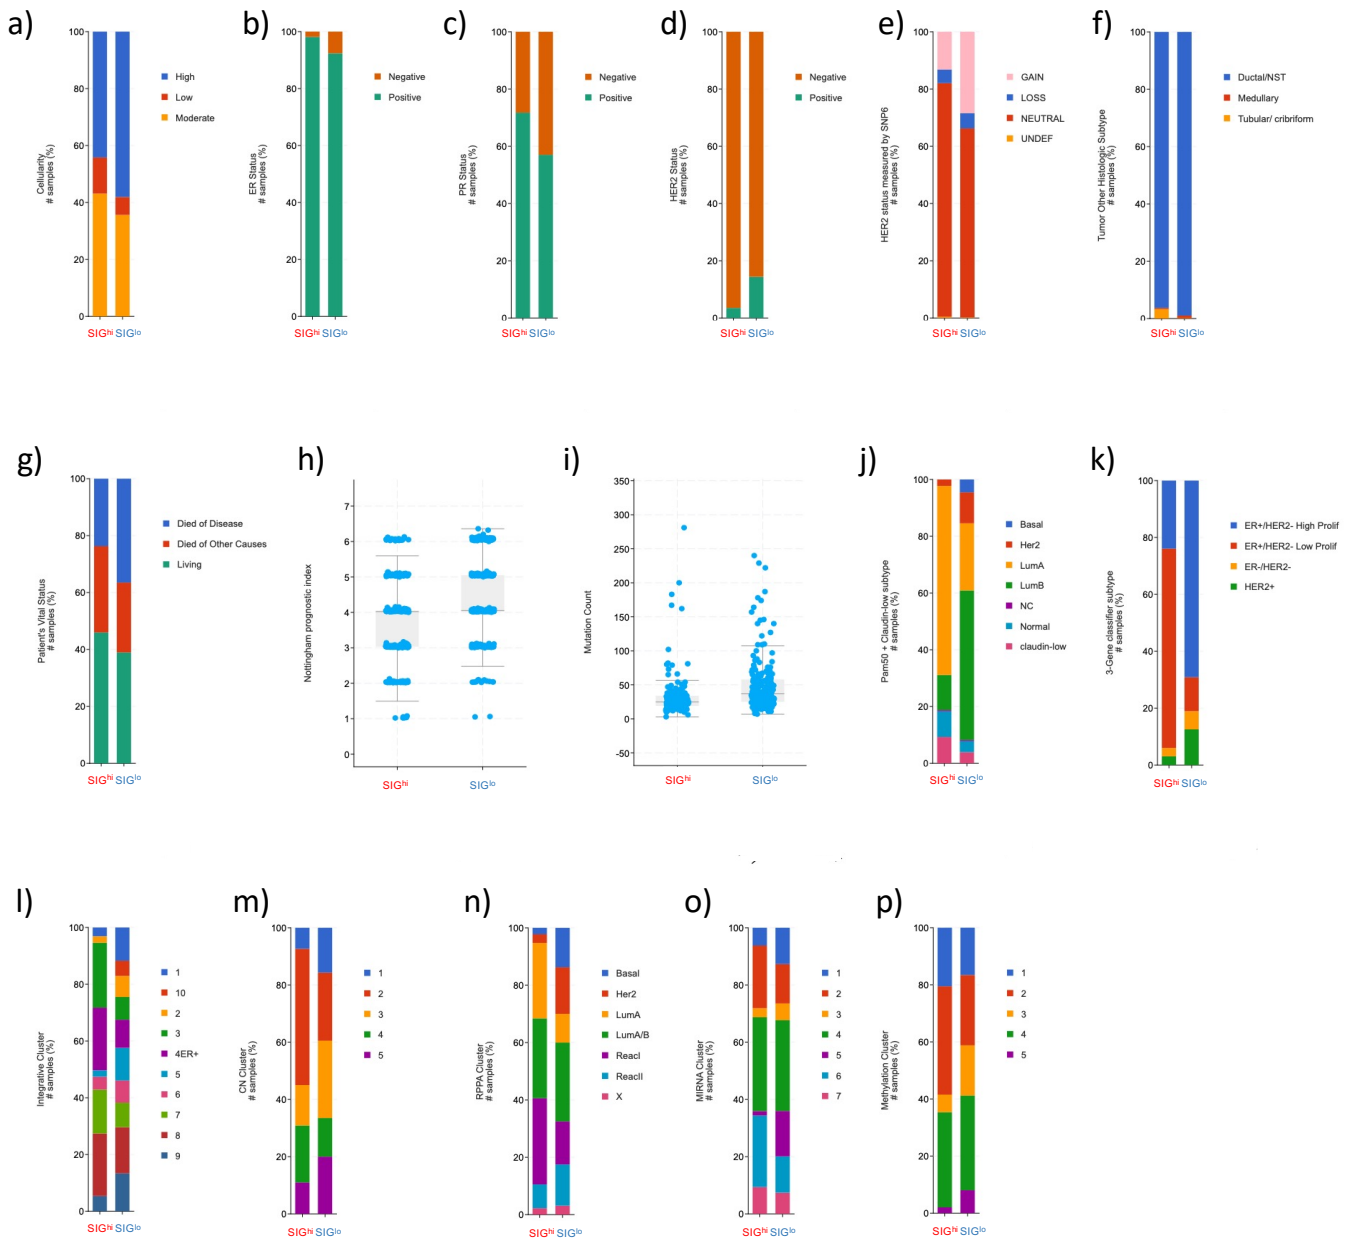

**Supplementary Figure 6: Clincopathological and molecular characteristics of pNSTING<sup>high</sup> and <sup>low</sup> breast cancers**

METABRIC and TCGA ER+ cohort data stratified by pNSTING signature score for **a)** Cellularity **b)** ER status **c)** PR status **d)** HER2 status **e)** HER2 status by SNP6 measurement **f)** histological subtype. **g)** Patient outcomes. **h)** Nottingham prognostic index score (all METABRIC) **i)** Mutational load (TCGA) **j)** PAM50 and Claudin low classified subgroups **k)** 3-gene classifier (METABRIC) **l)** Integrative Clusters **m)** CN clusters **n)** RPPA **o)** miRNA clusters and **p)** Methylation clusters (TCGA).



a)

|         | pnSTING  | IFI16    | NLRP3    | DDX58    | AIM2     | IFN sig |
|---------|----------|----------|----------|----------|----------|---------|
| pnSTING |          | 1.51E-04 | 8.35E-03 | 8.84E-04 | 2.41E-04 | 2.4E-06 |
| IFI16   | 1.51E-04 |          | 1.86E-02 | 9.00E-06 | 2.08E-04 | 3.9E-06 |
| NLRP3   | 8.35E-03 | 0.0186   |          | 0.685    | 0.0521   | 0.186   |
| DDX58   | 8.84E-04 | 9.00E-06 | 0.685    |          | 0.0534   | 1.9E-05 |
| AIM2    | 2.41E-04 | 2.08E-04 | 0.052    | 0.0534   |          | 2.3E-05 |
| IFN sig | 2.36E-06 | 3.89E-06 | 0.186    | 1.90E-05 | 2.25E-05 |         |

b)

|         | pnSTING | IFI16    | NLRP3 | DDX58 | AIM2     | IFN sig  |
|---------|---------|----------|-------|-------|----------|----------|
| pnSTING |         | 0.344    | 0.357 | 0.254 | 0.0493   | 0.354    |
| IFI16   | 0.344   |          | 0.619 | 0.025 | 2.25E-05 | 3.24E-06 |
| NLRP3   | 0.357   | 0.619    |       | 0.285 | 0.0787   | 0.278    |
| DDX58   | 0.254   | 0.025    | 0.285 |       | 0.0184   | 0.017    |
| AIM2    | 0.049   | 2.25E-05 | 0.079 | 0.018 |          | 1.38E-06 |
| IFN sig | 0.354   | 3.24E-06 | 0.278 | 0.017 | 1.38E-06 |          |

c)

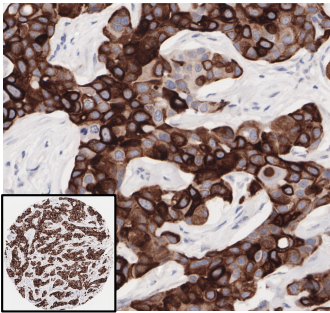

d)

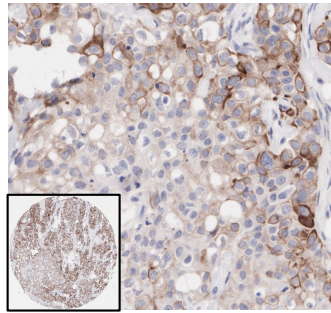

e)

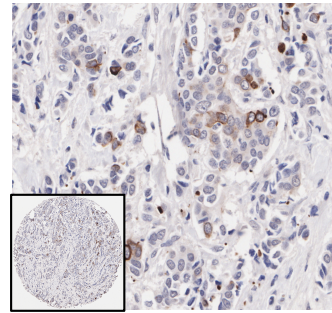

f)

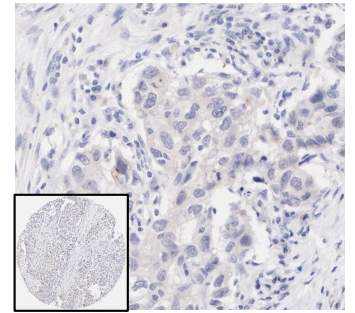

g)

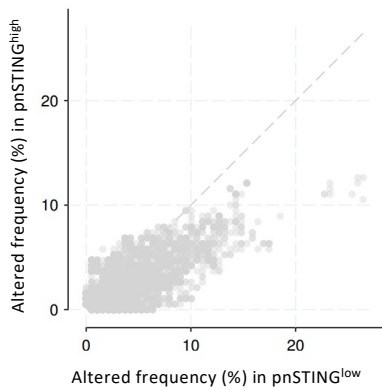

### Supplementary Figure 7: mTOR expression and pnSTING correlations

p values for calculated correlations in **a)** ER positive (left table) and **b)** ER negative (right table) breast cancers for pnSTING values, gene expression of cytosolic DNA and RNA sensors and interferon signaling. Non-significant values are indicated in blue. Representative IHC images of breast cancer samples with **c)** high, **d)** medium, **e)** low and **f)** absent mTOR signaling using phospho-specific mTOR antibody (Ser2448). Magnification x 40, Inset x 10. **g)** Percentage of ER+ cases with copy number alteration overall in the TCGA dataset.

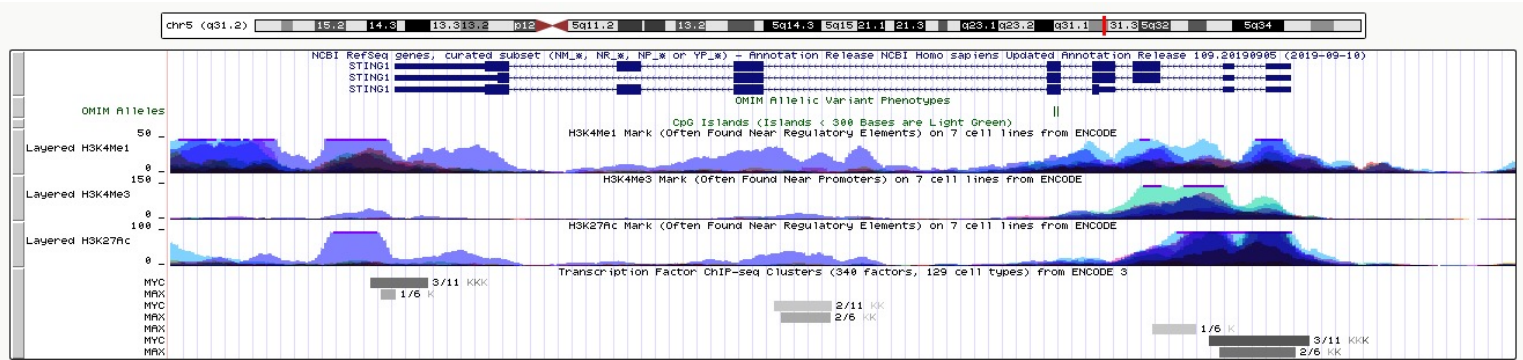

Supplementary Figure 8: Transcription factor analysis of *STING1* using ENCODE database  
 MYC and MAX predicted binding sites on *STING1*. (Note: *STING1* is encoded on the negative strand and therefore is viewed from right to left.)

Supplementary Table 1: Clinicopathological details of pnSTING scored cohort

| Characteristics (N=156)                    | N   | %    |
|--------------------------------------------|-----|------|
| <b><i>Tumor Grade</i></b>                  |     |      |
| G1                                         | 1   | 0.6  |
| G2                                         | 51  | 32.7 |
| G3                                         | 104 | 66.7 |
| <b><i>pN Stage (nodal involvement)</i></b> |     |      |
| N0                                         | 68  | 43.6 |
| N1mi                                       | 2   | 1.3  |
| N1                                         | 50  | 32.1 |
| N3                                         | 21  | 23.5 |
| N3                                         | 15  | 9.5  |
| <b><i>pT stage</i></b>                     |     |      |
| T1                                         | 31  | 19.9 |
| T2                                         | 93  | 59.6 |
| T3                                         | 27  | 17.3 |
| T4                                         | 5   | 3.2  |
| <b><i>Histological Type</i></b>            |     |      |
| Ductal (no special type)                   | 128 | 82   |
| Lobular (no special type)                  | 14  | 9    |
| Mixed ductal and lobular                   | 11  | 7.1  |
| Other                                      | 3   | 1.9  |
| <b><i>ER status</i></b>                    |     |      |
| Positive                                   | 92  | 59   |
| Negative                                   | 64  | 41   |

ER: Estrogen receptor; pT: pathological tumor stage; pN: pathological lymph node stage.

*Supplementary Table 2: STING expression and relapse free survival in discovery cohort (ER+ and ER-breast cancer)*

| <b>Relapse Free Survival</b> |      | <b>N(n)</b> | <b>HR</b> | <b>95% CI</b> | <b>p-value</b> |
|------------------------------|------|-------------|-----------|---------------|----------------|
|                              |      | 156 (37)    |           | Univariate    |                |
| <b>STING</b>                 | low  | 78 (23)     | 1         |               |                |
| <b>Stroma</b>                | high | 78 (14)     | 0.5528    | 0.29-1.054    | 0.0899         |
| <b>STING</b>                 | low  | 78 (23)     | 1         |               |                |
| <b>Tumor</b>                 | high | 78 (14)     | 0.5543    | 0.2908-1.057  | 0.0773         |
| <b>STING</b>                 | low  | 78 (26)     | 1         |               |                |
| <b>Perinuclear</b>           | high | 78 (11)     | 0.4046    | 0.2104-0.778  | 0.0096**       |

HR: Hazard ratio, CI: Confidence interval; n: events

*Supplementary Table 3: STING expression and relapse free survival in ER+ and ER- breast cancer*

| <b>ER+</b>                   |      | <b>N(n)</b> | <b>HR</b> | <b>95% CI</b>   | <b>p-value</b> |
|------------------------------|------|-------------|-----------|-----------------|----------------|
| <b>Relapse Free Survival</b> |      | 92 (19)     |           | Univariate      |                |
| <b>STING</b>                 | low  | 50 (16)     | 1         |                 |                |
| <b>Perinuclear</b>           | high | 42 (3)      | 0.1955    | 0.0795 – 0.4805 | 0.0038**       |
| <b>Multivariate</b>          |      |             |           |                 |                |
| <b>STING</b>                 | low  | 50 (16)     | 1         |                 |                |
| <b>Perinuclear</b>           | high | 42 (3)      | 0.2067    | 0.0588-0.7265   | 0.014*         |
| <b>ER-</b>                   |      |             |           |                 |                |
| <b>Relapse Free Survival</b> |      | 64 (17)     |           | Univariate      |                |
| <b>STING</b>                 | low  | 27 (8)      | 1         |                 |                |
| <b>Perinuclear</b>           | high | 36 (9)      | 0.8098    | 0.3089-2.123    | 0.6633         |

Multivariate in context of age (<40, 40-49, 50-59, >60), T status (1, 2, 3,4) and Lymph node (pos/neg). No other factor was significant.

Supplementary Table 4: Relapse free survival stratified by pNSTING (low/high) in consensus breast subgroups

|                              |      | <b>N(n)</b> | <b>HR</b>           | <b>95% CI</b> | <b>p-value</b> |
|------------------------------|------|-------------|---------------------|---------------|----------------|
| <b>Relapse Free Survival</b> |      | Univariate  |                     |               |                |
| <b>ER+/HER2-/Ki67-</b>       | low  | 22 (5)      | 1                   |               |                |
|                              | high | 20 (0)      | 0.1304 <sup>#</sup> | 0.0022-0.7568 | 0.0232*        |
| <b>ER+/HER2-/Ki67+</b>       | low  | 19 (7)      | 1                   |               |                |
|                              | high | 13 (2)      | 0.3570              | 0.0959-1.329  | 0.1776         |
| <b>ER+/HER2+/Ki67+</b>       | low  | 9 (4)       | 1                   |               |                |
|                              | high | 9 (1)       | 0.2347              | 0.0406-1.356  | 0.1574         |
| <b>ER-/HER2+</b>             | low  | 13 (5)      | 1                   |               |                |
|                              | high | 10 (2)      | 0.4320              | 0.0981-1.903  | 0.3005         |
| <b>ER-/PR/HER2-</b>          | low  | 14 (3)      | 1                   |               |                |
|                              | high | 26 (7)      | 1.327               | 0.3656-4.818  | 0.6805         |
| <b>ER+/HER2-/Ki67+/-</b>     | low  | 65 (23)     | 1                   |               |                |
|                              | high | 56 (8)      | 0.3729              | 0.1843-0.7542 | 0.0121*        |
| <b>ER+/-/HER2+</b>           | low  | 22(9)       | 1                   |               |                |
|                              | high | 19 (3)      | 0.3196              | 0.1030-0.9912 | 0.0703         |
| <b>Non-ER-/PR-/HER2-</b>     | low  | 87 (32)     | 1                   |               |                |
|                              | high | 75 (11)     | 0.3573              | 0.1965-0.6497 | 0.0020*        |

<sup>#</sup>Mantel-Haenszel HR reported

Supplementary Table 5: Associations of immunohistochemistry immune markers with ER+ and ER- breast cancer

| Perinuclear STING high vs low | Compartment | ER+ p-value | ER+ adjusted p-value | Pearson R | ER- p-value | ER- adjusted p-value | Pearson R |
|-------------------------------|-------------|-------------|----------------------|-----------|-------------|----------------------|-----------|
| <b>CD3</b>                    | Stromal     | 0.021       | 0.04                 | 0.261     | 0.037       | 0.20                 | 0.201     |
|                               | Tumoral     | 0.73        | 0.73                 | 0.164     | 0.18        | 0.36                 | 0.227     |
|                               | Whole core  | 0.15        | 0.25                 | 0.219     | 0.098       | 0.26                 | 0.230     |
| <b>CD4</b>                    | Stromal     | 0.017       | 0.0036               | 0.102     | 0.057       | 0.26                 | 0.199     |
|                               | Tumoral     | 0.00095     | 0.0028               | 0.037     | 0.96        | 0.96                 | 0.002     |
|                               | Whole core  | 0.00012     | 0.00077              | 0.136     | 0.085       | 0.26                 | 0.182     |
| <b>CD8</b>                    | Stromal     | 0.000087    | 0.00077              | 0.256     | 0.23        | 0.38                 | 0.307     |
|                               | Tumoral     | 0.00049     | 0.0020               | 0.030     | 0.33        | 0.46                 | 0.219     |
|                               | Whole core  | 0.000091    | 0.0077               | 0.180     | 0.24        | 0.38                 | 0.272     |
| <b>CD45RO</b>                 |             | 0.00011     | 0.0077               | 0.554     | 0.093       | 0.26                 | 0.164     |
| <b>CD20</b>                   | Stromal     | 0.52        | 0.57                 | 0.412     | 0.48        | 0.61                 | 0.125     |
|                               | Tumoral     | 0.15        | 0.25                 | 0.261     | 0.88        | 0.92                 | 0.188     |
|                               | Whole core  | 0.21        | 0.28                 | 0.003     | 0.8         | 0.88                 | 0.077     |
| <b>CD68</b>                   | Stromal     | 0.1         | 0.19                 | 0.085     | 0.23        | 0.38                 | 0.202     |
|                               | Tumoral     | 0.36        | 0.43                 | -0.030    | 0.008       | 0.16                 | 0.418     |
|                               | Whole core  | 0.24        | 0.31                 | 0.035     | 0.064       | 0.26                 | 0.272     |
| <b>CD163</b>                  | Stromal     | 0.7         | 0.72                 | 0.032     | 0.08        | 0.26                 | 0.344     |
|                               | Tumoral     | 0.65        | 0.69                 | -0.042    | 0.17        | 0.36                 | 0.132     |
|                               | Whole core  | 0.32        | 0.39                 | -0.018    | 0.034       | 0.20                 | 0.358     |
| <b>FOXP3</b>                  | -           | 0.18        | 0.27                 | 0.156     | 0.72        | 0.85                 | 0.200     |
| <b>Ki67</b>                   | Stromal     | 0.21        | 0.28                 | -0.005    | 0.89        | 0.92                 | 0.152     |
|                               | Tumoral     | 0.2         | 0.28                 | 0.023     | 0.75        | 0.86                 | 0.011     |
|                               | Whole core  | 0.17        | 0.27                 | -0.028    | 0.71        | 0.85                 | -0.011    |
| <b>TIM3</b>                   |             | 0.47        | 0.54                 | 0.038     | 0.46        | 0.61                 | 0.180     |
| <b>IDO1</b>                   |             | 0.00018     | 0.00096              | 0.194     | 0.3         | 0.44                 | 0.380     |
| <b>ICOS</b>                   |             | 0.000062    | 0.00077              | 0.141     | 0.013       | 0.16                 | 0.327     |
| <b>PD-L1 (SP142)</b>          | Stromal     | 0.00092     | 0.0028               | 0.120     | 0.015       | 0.16                 | 0.180     |
|                               | Tumoral     | 0.0024      | 0.0059               | 0.092     | 0.24        | 0.38                 | 0.336     |
|                               | Whole core  | 0.0003      | 0.0014               | 0.123     | 0.11        | 0.27                 | 0.195     |
| <b>PD-L1 (SP263)</b>          | Stromal     | 0.00081     | 0.0027               | 0.174     | 0.025       | 0.20                 | 0.239     |
|                               | Tumoral     | 0.0083      | 0.02                 | 0.048     | 0.28        | 0.43                 | 0.231     |
|                               | Whole core  | 0.0017      | 0.0045               | 0.010     | 0.17        | 0.36                 | 0.274     |

Significant p values are shown in red. The p-value were adjusted using the Benjamini Hochberg method.

*Supplementary Table 6: Associations of predicted immune infiltrating populations with ER+ and ER- breast cancer*

| Cell type        | ER+ p-value | ER+ adjusted p-value | ER- p-value | ER- adjusted p-value |
|------------------|-------------|----------------------|-------------|----------------------|
| B cells          | 0.023       | 0.05                 | 0.79        | 0.98                 |
| CD45             | 0.016       | 0.04                 | 0.34        | 0.84                 |
| CD8              | 0.012       | 0.04                 | 0.12        | 0.84                 |
| Cytotoxic T cell | 0.014       | 0.04                 | 0.86        | 0.98                 |
| Exhausted CD8    | 0.16        | 0.23                 | 0.98        | 0.98                 |
| T cells          | 0.00045     | 0.0036               | 0.84        | 0.98                 |
| Th1 cells        | 0.67        | 0.72                 | 0.87        | 0.98                 |
| Treg             | 0.27        | 0.33                 | 0.36        | 0.84                 |
| DC               | 0.038       | 0.07                 | 0.95        | 0.98                 |
| Macrophages      | 0.05        | 0.08                 | 0.35        | 0.84                 |
| Mast cells       | 0.26        | 0.33                 | 0.4         | 0.84                 |
| Neutrophils      | 0.92        | 0.92                 | 0.69        | 0.98                 |
| NK CD56Dim       | 0.44        | 0.50                 | 0.36        | 0.84                 |
| NK cell          | 0.011       | 0.04                 | 0.72        | 0.98                 |
| M1/M2            | 0.000031    | 0.00050              | 0.22        | 0.84                 |
| CD68/CD8         | 0.022       | 0.05                 | 0.42        | 0.84                 |

Significant p values on correction for multiple testing are shown in red for those associated with high pnSTING and in blue for those significantly associated with low pnSTING. The p-value were adjusted using the Benjamini Hochberg method

*Supplementary Table 7: pnSTING<sup>low</sup> gene signature*

|           |
|-----------|
| IMPA2     |
| SLC2A4    |
| CDT1      |
| CFAP47    |
| RABGGTB   |
| NCAPD3    |
| ABRA      |
| SLC35C2   |
| DNAH12    |
| SLC35E2B  |
| LINC00479 |
| HYDIN2    |
| CSN3      |
| FAM71B    |
| RCAN3     |
| MSH2      |
| PCDHA2    |
| SHISA3    |
| EXO1      |
| GALNT14   |
| VPS33A    |
| DLGAP5    |
| HFM1      |
| BEND3     |
| MEX3B     |

\*Note: signature = -sum(gene expression)



Supplementary Table 8: pnSTING gene signature applied to independent datasets

| Gene Signature                  |      | N(n)      | HR     | %95 CI         | p-value   |
|---------------------------------|------|-----------|--------|----------------|-----------|
| <b>Relapse Free Survival</b>    |      |           |        |                |           |
| Univariate                      |      |           |        |                |           |
| ER+<br>IHC cohort               | low  | 46 (14)   | 1      |                |           |
|                                 | high | 46 (5)    | 0.3220 | 0.1309-0.7924  | 0.0217*   |
| ER-<br>IHC cohort               | low  | 32 (9)    | 1      |                |           |
|                                 | high | 32 (8)    | 0.8985 | 0.3472-2.325   | 0.8254    |
| ER+ & ER-<br>IHC cohort         | low  | 78 (24)   | 1      |                |           |
|                                 | high | 78 (12)   | 0.4402 | 0.2287-0.8471  | 0.0169*   |
| ER+<br>Non IHC cohort           | low  | 39 (10)   | 1      |                |           |
|                                 | high | 37 (3)    | 0.263  | 0.08845-0.7818 | 0.0263*   |
| ER-<br>Non IHC cohort           | low  | 20 (9)    | 1      |                |           |
|                                 | high | 17 (8)    | 0.6018 | 0.2284-1.586   | 0.2896    |
| ER+ & ER-<br>Non IHC cohort     | low  | 71 (18)   | 1      |                |           |
|                                 | high | 45 (12)   | 0.3126 | 0.1525-0.6409  | 0.0029**  |
| <b>METABRIC (2012&amp;2016)</b> |      |           |        |                |           |
| <b>Overall Survival</b>         |      |           |        |                |           |
| Univariate                      |      |           |        |                |           |
| ER+                             | low  | 486 (297) | 1      |                |           |
|                                 | high | 485(262)  | 0.8098 | 0.6855-0.9650  | 0.0125*   |
| ER-                             | low  | 167 (85)  | 1      |                |           |
|                                 | high | 166 (96)  | 1.258  | 0.9394-1.684   | 0.1201    |
| ER+<br>No chemo                 | low  | 433 (270) | 1      |                |           |
|                                 | high | 432 (240) | 0.8322 | 0.6995-0.99    | 0.0379*   |
| ER+<br>Chemo                    | low  | 53 (29)   | 1      |                |           |
|                                 | high | 53 (20)   | 0.5356 | 0.3046-0.9419  | 0.028*    |
| <b>TCGA Nature 2012</b>         |      |           |        |                |           |
| <b>Relapse Free Survival</b>    |      |           |        |                |           |
| Univariate                      |      |           |        |                |           |
| ER+                             | low  | 189 (25)  | 1      |                |           |
|                                 | high | 191 (20)  | 0.5481 | 0.3030-0.9953  | 0.0405*   |
| ER-                             | low  | 59 (10)   | 1      |                |           |
|                                 | high | 59 (7)    | 1.441  | 0.5569-3.729   | 0.4251    |
| <b>GSE2034 (Wang et al)</b>     |      |           |        |                |           |
| <b>Relapse Free Survival</b>    |      |           |        |                |           |
| Univariate                      |      |           |        |                |           |
| ER+                             | low  | 104 (52)  | 1      |                |           |
|                                 | high | 105 (28)  | 0.4292 | 0.2761-0.6672  | 0.0002*** |
| ER-                             | low  | 39 (10)   | 1      |                |           |
|                                 | high | 38 (17)   | 1.779  | 0.8364-3.783   | 0.1406    |

*Supplementary Table 9: TP53, PIK3CA and MAP3K1 alterations in ER+ METABRIC and TCGA datasets stratified by pnSTING signature*

| Dataset                   | Gene   | No. cases with alteration (%) |                | Log Ratio | p-value   | q-value   |
|---------------------------|--------|-------------------------------|----------------|-----------|-----------|-----------|
|                           |        | STING Sig low                 | STING Sig high |           |           |           |
| <b>Mutations</b>          |        |                               |                |           |           |           |
| <b>META-BRIC</b>          | TP53   | 179 (36.83)                   | 61 (12.58)     | -1.55     | <10 e-10  | <10 e-10  |
|                           | PIK3CA | 185 (38.07)                   | 268 (55.26)    | 0.54      | 5.26 e-8  | 4.549 e-6 |
|                           | MAP3K1 | 31 (6.38)                     | 83 (17.11)     | 1.42      | 1.15 e-7  | 6.61 e-6  |
| <b>TCGA (Nature 2012)</b> | TP53   | 73 (38.02)                    | 19 (9.95)      | -1.93     | 5.09 e-11 | 4.40 e-7  |
|                           | PIK3CA | 61 (31.77)                    | 94 (49.21)     | 0.63      | 3.596 e-4 | 0.577     |
|                           | MAP3K1 | 11 (5.73)                     | 27 (14.14)     | 1.3       | 4.55e-3   | 0.577     |

*Supplementary Table 10: Copy number alterations of MYC and CCND1 in ER+ METABRIC and TCGA datasets stratified by pnSTING signature*

| Dataset                   | Gene               | No Cases with alteration (%) |                | Log Ratio | p-value   | q-value  |
|---------------------------|--------------------|------------------------------|----------------|-----------|-----------|----------|
|                           |                    | STING Sig low                | STING Sig high |           |           |          |
| <b>CNA</b>                |                    |                              |                |           |           |          |
| <b>META-BRIC</b>          | MYC<br>(8q24,21)   | 171 (35.19)                  | 77 (15.88)     | -1.15     | <10 e-10  | 5.75 e-9 |
|                           | CCND1<br>(11q13.3) | 145 (29.63)                  | 56 (11.55)     | -1.37     | <10 e-10  | 2.76 e-9 |
| <b>TCGA (Nature 2012)</b> | MYC<br>(8q24,21)   | 28 (14.81)                   | 16 (8.42)      | -0.81     | 0.0369    | 0.563    |
|                           | CCND1<br>(11q13.3) | 50 (26.46)                   | 24 (12.63)     | -1.07     | 5.035 e-4 | 0.166    |

Supplementary Table 11: Antibodies used in IHC

| <b>Antibody</b> | <b>Clone</b> | <b>Company</b>    | <b>Catalogue Number</b> | <b>Platform</b>         | <b>Retrieval</b>             | <b>Dilution</b>          | <b>Incubation</b>        | <b>Detection</b>                                         |
|-----------------|--------------|-------------------|-------------------------|-------------------------|------------------------------|--------------------------|--------------------------|----------------------------------------------------------|
| <b>STING</b>    | Poly         | Protein Tech      | 19851-1-AP              | Leica Bond RX           | ER1<br>20min<br>ER1<br>20min | 1:100<br>0<br>1:200<br>0 | 15min @ RT<br>30min @ RT | DAB Polymer Refine +<br>Enhancer<br>Opal Fluorophore 690 |
| <b>ER</b>       | 6F11         | Leica             | NCL-L-ER-6F11           | Leica Bond RX           | ER2<br>30min                 | 1:200                    | 15min @ RT               | DAB Polymer Refine +<br>Enhancer                         |
| <b>HER2</b>     | CB11         | Leica             | NCL-L-CB11              | Leica Bond RX           | ER1<br>25min                 | 1:40                     | 15min @ RT               | DAB Polymer Refine +<br>Enhancer                         |
| <b>KI-67</b>    | 30-9         | Roche             | 790-4286                | Ventana<br>Benchmark XT | CC1<br>32min                 | Neat                     | 16min @<br>37C           | Optiview DAB Kit                                         |
| <b>CK</b>       | AE1/AE3      | Dako              | M3515                   | Leica Bond RX           | ER2<br>20min<br>ER2<br>20min | 1:200<br>1:200           | 15min @RT<br>30min @RT   | DAB Polymer Refine +<br>Enhancer<br>Opal Fluorophore 520 |
| <b>CD3</b>      | 2GV6         | Roche             | 790-4341                | Ventana<br>Benchmark XT | CC1<br>32min                 | Neat                     | 16min @<br>37C           | Optiview DAB Kit                                         |
| <b>CD4</b>      | SP35         | Roche             | 790-4423                | Ventana<br>Benchmark XT | CC1<br>32min                 | Neat                     | 16min @<br>37C           | Ultraview DAB Kit                                        |
| <b>CD8</b>      | C8/144B      | Dako              | M7103                   | Leica Bond RX           | ER2<br>20min                 | 1:200                    | 15min @ RT               | DAB Polymer Refine +<br>Enhancer                         |
| <b>CD20</b>     | L26          | Dako              | M0755                   | Leica Bond RX           | ER1<br>30min                 | 1:400                    | 15min @ RT               | DAB Polymer Refine +<br>Enhancer                         |
| <b>CD68</b>     | 514H12       | Leica             | PA0273                  | Leica Bond RX           | ER2<br>20min                 | 1:200                    | 30min @ RT               | DAB Polymer Refine +<br>Enhancer                         |
| <b>CD45RO</b>   | UCHL1        | Leica             | NCL-L-UCHL1             | Leica Bond RX           | ER1<br>20min                 | 1:200<br>0               | 15min @ RT               | DAB Polymer Refine +<br>Enhancer                         |
| <b>CD163</b>    | 10D6         | Leica             | PA0090                  | Leica Bond RX           | ER2<br>20min                 | Neat                     | 15min @ RT               | DAB Polymer Refine +<br>Enhancer                         |
| <b>FOXP3</b>    | SP97         | LSBIO             | LS-C210349              | Leica Bond RX           | ER2<br>20min                 | 1:50                     | 15min @ RT               | DAB Polymer Refine +<br>Enhancer                         |
| <b>ICOS</b>     | D1K2T        | Cell Signaling    | #89601                  | Leica Bond RX           | ER2<br>20min                 | 1:400                    | 15min @ RT               | DAB Polymer Refine +<br>Enhancer                         |
| <b>IDO1</b>     | D5J4E        | Cell Signaling    | #86630                  | Leica Bond RX           | ER2<br>20min                 | 1:400                    | 15min @ RT               | DAB Polymer Refine +<br>Enhancer                         |
| <b>mTOR</b>     | 49F9         | Cell Signaling    | #2976                   | Leica Bond RX           | ER2<br>20min                 | 1:100                    | 15min @ RT               | DAB Polymer Refine +<br>Enhancer                         |
| <b>PD-L1</b>    | SP263        | Roche             | 790-4905                | Ventana<br>Benchmark XT | CC1<br>64min                 | Neat                     | 16min @<br>37C           | Optiview DAB Kit                                         |
| <b>PD-L1</b>    | SP142        | Spring Bioscience | M4420                   | Ventana<br>Benchmark XT | CC1<br>64min                 | 1:40                     | 16min @<br>37C           | Optiview DAB Kit                                         |
| <b>TIM3</b>     | D5D5R        | Cell Signaling    | #45208                  | Leica Bond RX           | ER2<br>20min                 | 1:200                    | 15min @ RT               | DAB Polymer Refine +<br>Enhancer                         |
